# Supplementary material
Source: PubMed Central journal article supplement (PMC8730330)
Supplement: NIHMS1763726-supplement-Supplementary_Material.pdf [file NIHMS1763726-supplement-Supplementary_Material.pdf]

## 8 SUPPLEMENTARY FILE

### 8.1 Proof of Proposition 1

The claim quickly follows from two well known linear algebra theorems: Woodbury identity and matrix determinant lemma. We recall the both results below.

**Theorem 8.1** *Theorem 1. Suppose that  $A$  and  $C$  are invertible  $n$  by  $n$  matrices and  $U, V$  are  $n$  by  $p$  matrices. Then*

$$\begin{aligned} \det(A + UV^\top) &= \det(\mathbf{I}_p + V^\top A^{-1}U) \det(A) \quad \text{and} \\ (A + UCV)^{-1} &= A^{-1} - A^{-1}U(C^{-1} + VA^{-1}U)^{-1}VA^{-1}. \end{aligned}$$

We will start with the proof of the first claim. Thanks to Theorem 1.,

$$\begin{aligned} \det(\overset{[k]}{V}_\lambda) &= \det(\overset{[k]}{W} + \overset{[k]}{Z} \overset{[k]}{\tilde{Q}}_\lambda^{-1} \overset{[k]}{Z}^\top) = \det(\mathbf{I}_p + \overset{[k]}{Z}^\top \overset{[k]}{W}^{-1} \overset{[k]}{Z} \overset{[k]}{\tilde{Q}}_\lambda^{-1}) \det(\overset{[k]}{W}) \\ &= \det(\overset{[k]}{\tilde{Q}}_\lambda + \overset{[k]}{Z}^\top \overset{[k]}{W}^{-1} \overset{[k]}{Z}) \det(\overset{[k]}{\tilde{Q}}_\lambda)^{-1} \det(\overset{[k]}{W}). \end{aligned}$$

Now

$$\ln \det(\overset{[k]}{V}_\lambda) = \ln \det(\lambda_Q Q + \lambda_R \mathbf{I}_p + \Omega) - \ln \det(\lambda_Q Q + \lambda_R \mathbf{I}_p) + \ln \det(\overset{[k]}{W}),$$

which finishes the proof. To show the second claim, we will rewrite  $V_\lambda^{-1}$  as

$$V_\lambda^{-1} = W^{-1} - W^{-1} Z (\lambda_Q Q + \lambda_R \mathbf{I}_p + \Omega)^{-1} Z^\top W^{-1},$$

thanks to (8.1). Therefore

$$\tilde{y}^\top V_\lambda^{-1} \tilde{y} = - \tilde{q}^\top (\lambda_Q Q + \lambda_R \mathbf{I}_p + \Omega)^{-1} \tilde{q} + \tilde{y}^\top W^{-1} \tilde{y}.$$

### 8.2 Gradient and Hessian for the objective in (18)

Denote by  $h(\lambda_Q, \lambda_R)$  the objective function of interest, i.e.

$$h(\lambda_Q, \lambda_R) := \ln \det(\lambda_Q Q + \lambda_R \mathbf{I}_p + \Omega) - \ln \det(\lambda_Q Q + \lambda_R \mathbf{I}_p) - q^\top (\lambda_Q Q + \lambda_R \mathbf{I}_p + \Omega)^{-1} q,$$

where  $\Omega$  and  $q$  were defined in the statement of proposition 3 (“[k]”s symbols were omitted for clarity). After using notations  $D_\lambda := (\lambda_Q Q + \lambda_R I_p + \Omega)^{-1}$  and  $\tilde{Q}_\lambda := \lambda_Q Q + \lambda_R I_p$ , this function takes the short form

$$h(\lambda_Q, \lambda_R) = \ln \det D_\lambda^{-1} - \ln \det \tilde{Q}_\lambda - q^\top D_\lambda q.$$

To find the gradient and Hessian of  $h$  we will use the following well known formulas

**Proposition 8.2** *Suppose that  $A$  and  $B$  are  $p$  by  $p$ , symmetric, positive semi-definite matrices,  $\nu$  is  $p$  is  $p$ -dimensional vector and  $tA + sB$  is positive definite. Then it holds*

- $\frac{\partial}{\partial t} \left\{ \ln \det (tA + sB) \right\} = \text{tr} \left[ (tA + sB)^{-1} A \right],$
- $\frac{\partial^2}{\partial t \partial s} \left\{ \ln \det (tA + sB) \right\} = -\text{tr} \left[ (tA + sB)^{-1} A (tA + sB)^{-1} B \right],$
- $\frac{\partial^2}{\partial t^2} \left\{ \ln \det (tA + sB) \right\} = -\text{tr} \left[ \left( (tA + sB)^{-1} A \right)^2 \right],$
- $\frac{\partial}{\partial t} \left\{ -\nu^\top (tA + sB)^{-1} \nu \right\} = \nu^\top (tA + sB)^{-1} A (tA + sB)^{-1} \nu,$
- $\frac{\partial^2}{\partial t \partial s} \left\{ -\nu^\top (tA + sB)^{-1} \nu \right\} = -\nu^\top (tA + sB)^{-1} A (tA + sB)^{-1} B (tA + sB)^{-1} \nu$   
 $\quad - \nu^\top (tA + sB)^{-1} B (tA + sB)^{-1} A (tA + sB)^{-1} \nu,$
- $\frac{\partial^2}{\partial t^2} \left\{ -\nu^\top (tA + sB)^{-1} \nu \right\} = -2\nu^\top (tA + sB)^{-1} A (tA + sB)^{-1} A (tA + sB)^{-1} \nu.$

Thanks to the above, we quickly get

$$\nabla h|_{\lambda=\lambda_0} = \begin{bmatrix} \text{tr} \left[ (D_{\lambda_0} - \tilde{Q}_{\lambda_0}^{-1}) Q \right] + q^\top D_{\lambda_0} Q D_{\lambda_0} q \\ \text{tr} \left[ D_{\lambda_0}^2 - \tilde{Q}_{\lambda_0}^{-2} \right] + q^\top D_{\lambda_0}^2 q \end{bmatrix}.$$

and

$$\mathbf{H}(h)|_{\lambda=\lambda_0} = \begin{bmatrix} \mathbf{H}_{11} & \mathbf{H}_{12} \\ \mathbf{H}_{21} & \mathbf{H}_{22} \end{bmatrix},$$

where

$$\begin{aligned} \mathbf{H}_{11} &:= -\text{tr} \left[ D_{\lambda_0} Q D_{\lambda_0} Q - \tilde{Q}_{\lambda_0}^{-1} Q \tilde{Q}_{\lambda_0}^{-1} Q \right] - 2q^\top D_{\lambda_0} Q D_{\lambda_0} Q D_{\lambda_0} q, \\ \mathbf{H}_{22} &:= -\text{tr} \left[ D_{\lambda_0}^2 - \tilde{Q}_{\lambda_0}^{-2} \right] - 2q^\top D_{\lambda_0}^3 q, \\ \mathbf{H}_{12} = \mathbf{H}_{21} &:= -\text{tr} \left[ (D_{\lambda_0}^2 - \tilde{Q}_{\lambda_0}^{-2}) Q \right] - q^\top D_{\lambda_0} Q D_{\lambda_0}^2 q - q^\top D_{\lambda_0}^2 Q D_{\lambda_0} q. \end{aligned}$$

### 8.3 Asymptotic confidence interval

We start from the optimization problem

$$\operatorname{argmin}_{B \in \mathbb{R}^{p+m}} \left\{ \underbrace{\sum_i \psi(\mathcal{X}_i B) - y^\top \mathcal{X} B + \frac{1}{2} B^\top \mathcal{Q} B}_{\ell(B)} \right\}. \quad (21)$$

Calculating the derivatives of  $\ell$  yields

$$\frac{\partial \ell}{\partial B}(B) = \mathcal{X}^\top \psi'(\mathcal{X} B) - \mathcal{X}^\top y + \mathcal{Q} B \quad \text{and} \quad \frac{\partial^2 \ell}{\partial B^2}(B) = \mathcal{X}^\top \Psi_{\mathcal{X} B} \mathcal{X} + \mathcal{Q}, \quad (22)$$

where

$$\begin{cases} \psi'(\mathcal{X} B) := [\psi'(\mathcal{X}_1 B), \dots, \psi'(\mathcal{X}_n B)]^\top \\ \Psi_{\mathcal{X} B} := \operatorname{diag} \{ \psi''(\mathcal{X}_1 B), \dots, \psi''(\mathcal{X}_n B) \} \end{cases}.$$

Denote by  $B_\top$  the true signal and consider the Taylor series expansion of  $\frac{\partial \ell}{\partial B}$  about  $B_\top$ . If we consider the value of Taylor polynomial in the solution of (21),  $\hat{B}$ , this yields the following expression

$$\frac{\partial \ell}{\partial B}(\hat{B}) = \frac{\partial \ell}{\partial B}(B_\top) + (\hat{B} - B_\top)^\top \frac{\partial^2 \ell}{\partial B^2}(B_\top) + o(\|\hat{B} - B_\top\|_2^2)$$

Since the left-hand side of the above equals zero, using (22) we get the first-order approximation of  $\hat{B}$

$$\begin{aligned} \hat{B} &= B_\top - \left[ \frac{\partial^2 \ell}{\partial B^2}(B_\top) \right]^{-1} \frac{\partial \ell}{\partial B}(B_\top) = \\ &= B_\top - \left[ \mathcal{X}^\top \Psi_{\mathcal{X} B_\top} \mathcal{X} + \mathcal{Q} \right]^{-1} \left[ \mathcal{X}^\top \psi'(\mathcal{X} B_\top) - \mathcal{X}^\top y + \mathcal{Q} B_\top \right] = \\ &= \left[ \mathcal{X}^\top \Psi_{\mathcal{X} B_\top} \mathcal{X} + \mathcal{Q} \right]^{-1} \left[ (\mathcal{X}^\top \Psi_{\mathcal{X} B_\top} \mathcal{X} + \mathcal{Q}) B_\top - \mathcal{X}^\top \psi'(\mathcal{X} B_\top) + \mathcal{X}^\top y - \mathcal{Q} B_\top \right] = \\ &= \left[ \mathcal{X}^\top \Psi_{\mathcal{X} B_\top} \mathcal{X} + \mathcal{Q} \right]^{-1} \left[ \mathcal{X}^\top \Psi_{\mathcal{X} B_\top} \mathcal{X} B_\top - \mathcal{X}^\top \psi'(\mathcal{X} B_\top) + \mathcal{X}^\top y \right] = \\ &= \left[ \mathcal{X}^\top \Psi_{\mathcal{X} B_\top} \mathcal{X} + \mathcal{Q} \right]^{-1} \mathcal{X}^\top \Psi_{\mathcal{X} B_\top} \mathcal{X} \hat{B}^0, \end{aligned}$$

where  $\hat{B}^0 := B_\top + \left[ \mathcal{X}^\top \Psi_{\mathcal{X} B_\top} \mathcal{X} \right]^{-1} \left( \mathcal{X}^\top y - \mathcal{X}^\top \psi'(\mathcal{X} B_\top) \right)$  is the first-order approximation of the generalized linear model estimate, i.e. for  $\mathcal{Q} = 0$ . It was shown that, under some regularity conditions, this estimate is unbiased and asymptotic normal (Fahrmeir & Kaufmann, 1985). The corresponding

asymptotic variance is  $\left[\mathcal{X}^\top \Psi_{\mathcal{X}B_T} \mathcal{X}\right]^{-1}$ . Consequently, the asymptotic variance,  $var_a$ , of  $\hat{B}$  is given by

$$var_a(\hat{B}) = \left[\mathcal{X}^\top \Psi_{\mathcal{X}B_T} \mathcal{X} + \mathcal{Q}\right]^{-1} \mathcal{X}^\top \Psi_{\mathcal{X}B_T} \mathcal{X} \left[\mathcal{X}^\top \Psi_{\mathcal{X}B_T} \mathcal{X} + \mathcal{Q}\right]^{-1}.$$

## 8.4 Signal patterns

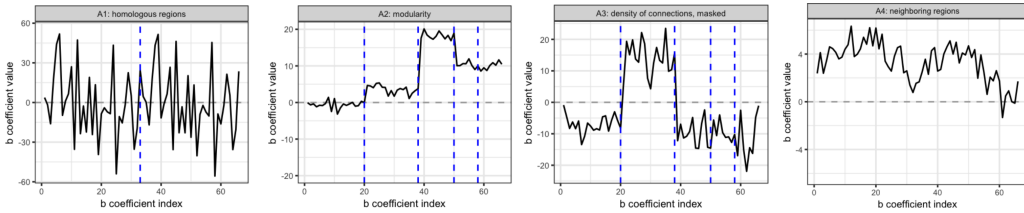

Figure 12: Exemplary vectors of  $b$  model coefficients generated as  $b \sim \mathcal{N}(0, \sigma_b^2(Q^{true})^{-1})$ , where  $Q^{true}$  is Laplacian matrix of  $\mathcal{A}^{true}$  graph adjacency matrix. Clearly,  $b$  coefficient values reflect the connectivity structure represented by  $\mathcal{A}^{true}$  matrices assumed in the simulation study; left plot:  $\mathcal{A}_1$  “homologous regions”, middle left plot:  $\mathcal{A}_2$  “modularity”, middle right plot:  $\mathcal{A}_3$  “density of connections, masked”, right plot:  $\mathcal{A}_4$  “neighboring regions” (see: Fig. 2). In the left plot, vertical dashed line marks the separation between coefficients corresponding to left hemisphere brain regions and right hemisphere brain regions assumed in  $\mathcal{A}_1$  “homologous regions” construction. In the middle left plot, vertical dashed lines mark the separation between connectivity modules assumed in  $\mathcal{A}_2$  “homologous regions” construction. In the middle right plot, vertical dashed lines mark the separation between connectivity modules assumed in  $\mathcal{A}_3$  “homologous regions” construction.

## 8.5 Numerical experiments settings

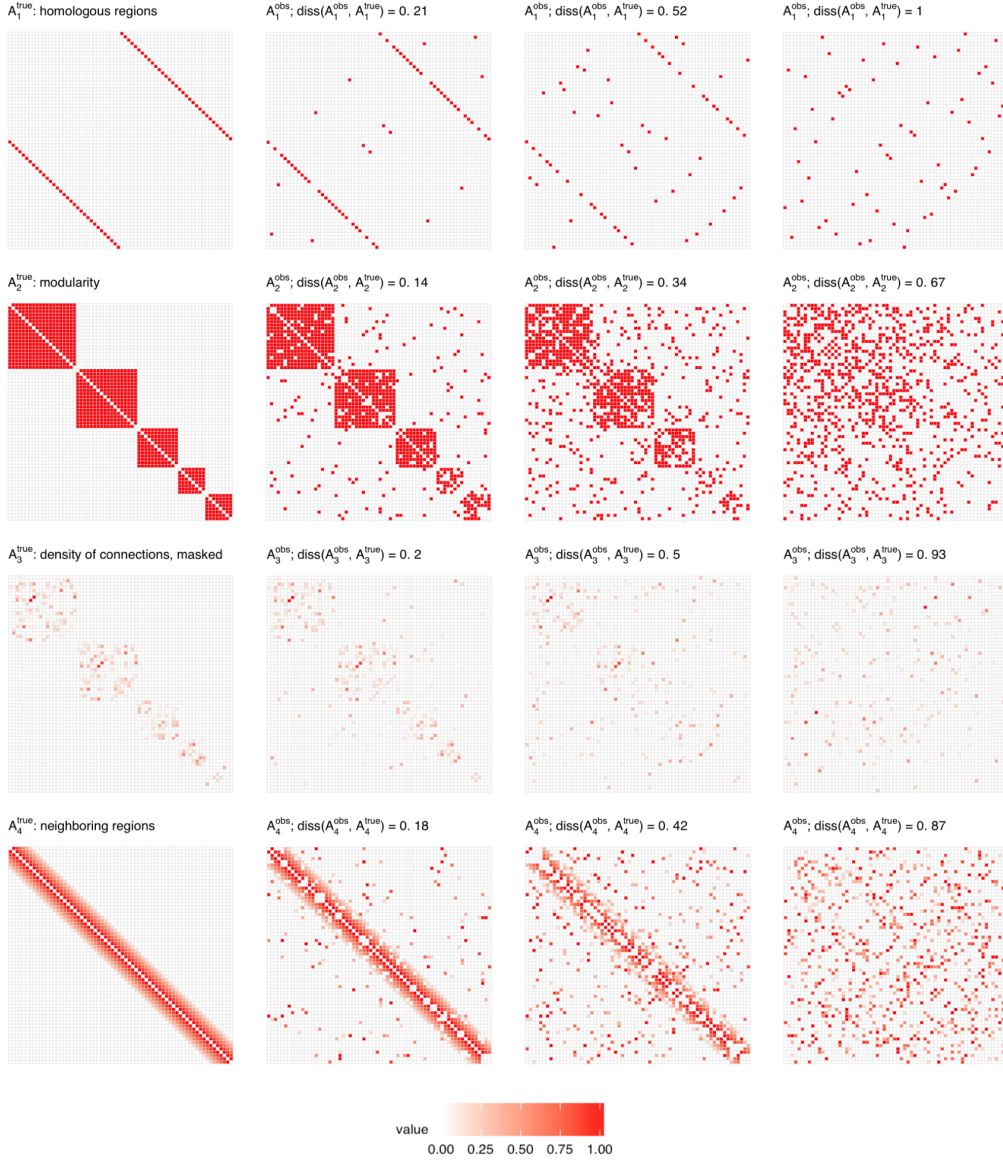

Figure 13:  $A^{true}$  connectivity graph adjacency matrices (1st column panels) and  $A^{obs}$  connectivity graph adjacency matrices (2nd-4th column panels) used in Scenario 1.  $A^{obs}$  matrix is constructed by randomizing  $A^{true}$  until a desired dissimilarity,  $diss(A^{obs}, A^{true})$ , is achieved

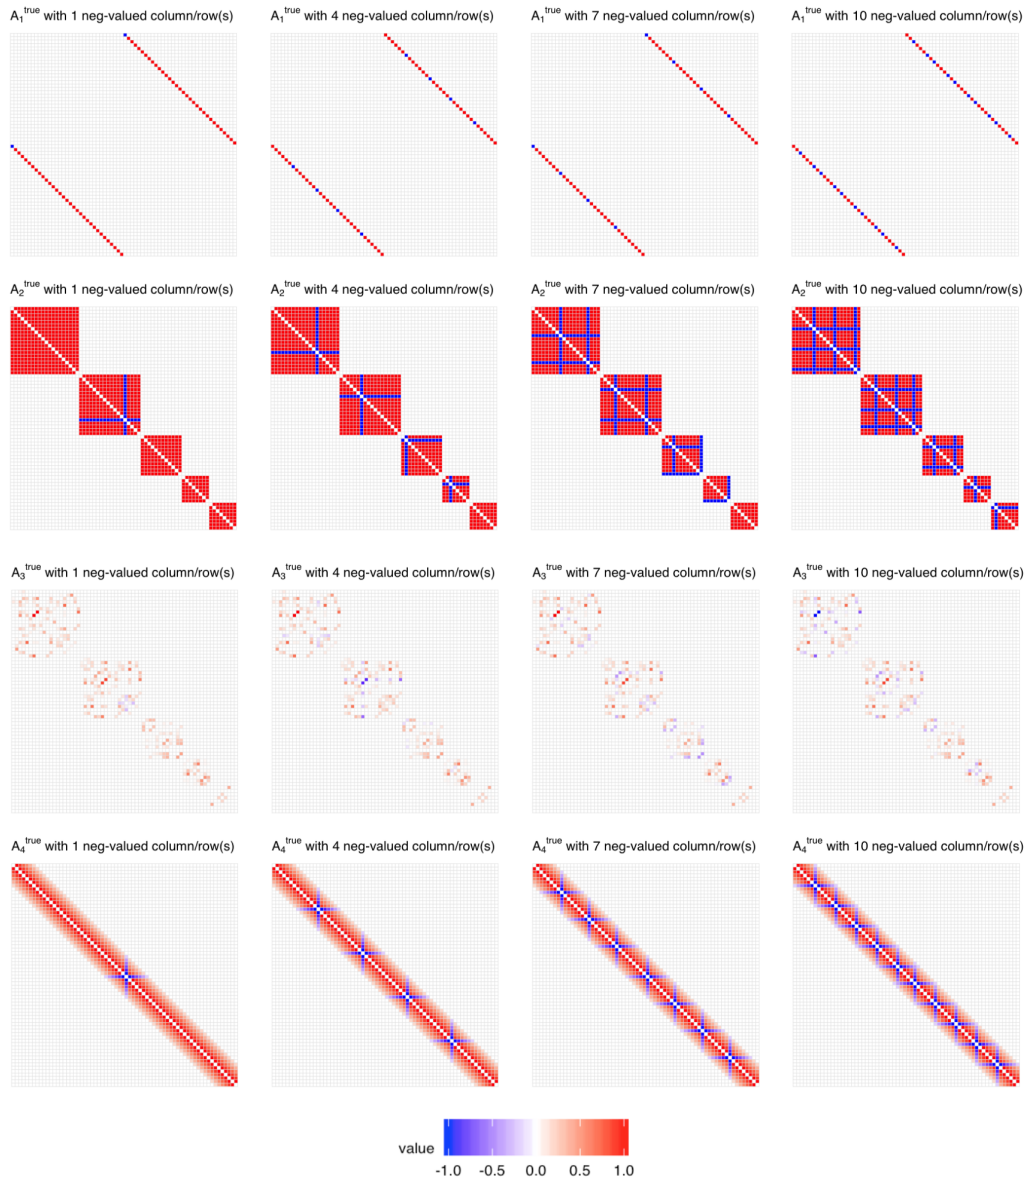

Figure 14:  $\mathcal{A}^{true}$  connectivity graph adjacency matrices used in Scenario 2.  $\mathcal{A}^{true}$  matrix is constructed from  $\mathcal{A}_1, \dots, \mathcal{A}_4$  matrices (1st-4th row panels, respectively) by changing of  $k$ ,  $k \in \{1, 4, 7, 10\}$ , columns (and corresponding rows) of this matrix into their negative values (such structure of  $\mathcal{A}^{true}$  yields the tendency that  $k$  coefficients of true signal will be separated from others.)

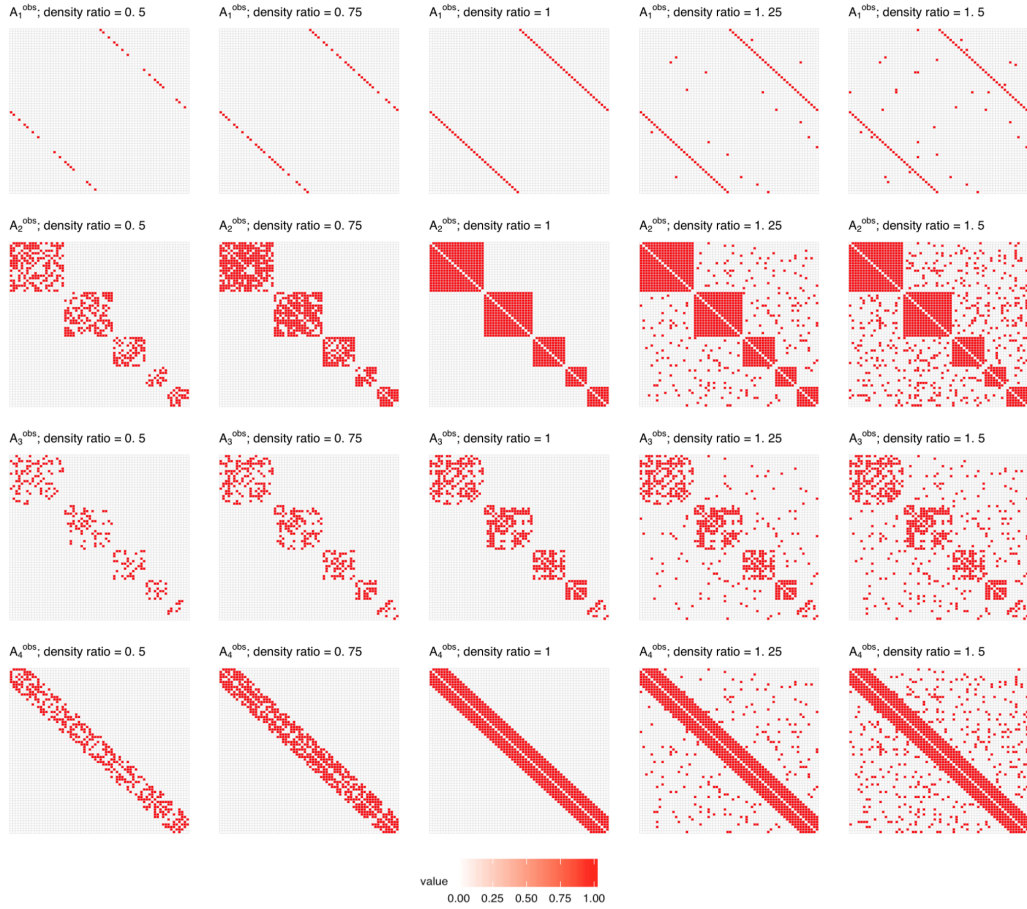

Figure 15:  $\mathcal{A}^{true}$  and  $\mathcal{A}^{obs}$  connectivity graph adjacency matrices used in Scenario 3.  $\mathcal{A}^{true}$  matrix is defined as one of  $\mathcal{A}_1, \dots, \mathcal{A}_4$  matrices (1st-4th row panels, respectively). Corresponding  $\mathcal{A}^{obs}$  is constructed by randomly removing or adding edges to the graph of connections represented by  $\mathcal{A}^{true}$  until desired density ratio,  $dens(\mathcal{A}^{obs})/dens(\mathcal{A}^{true})$ , is obtained (the ratio increases from 0.5 to 1.5 from left to right in each row plot panel).

## 8.6 Numerical experiments results

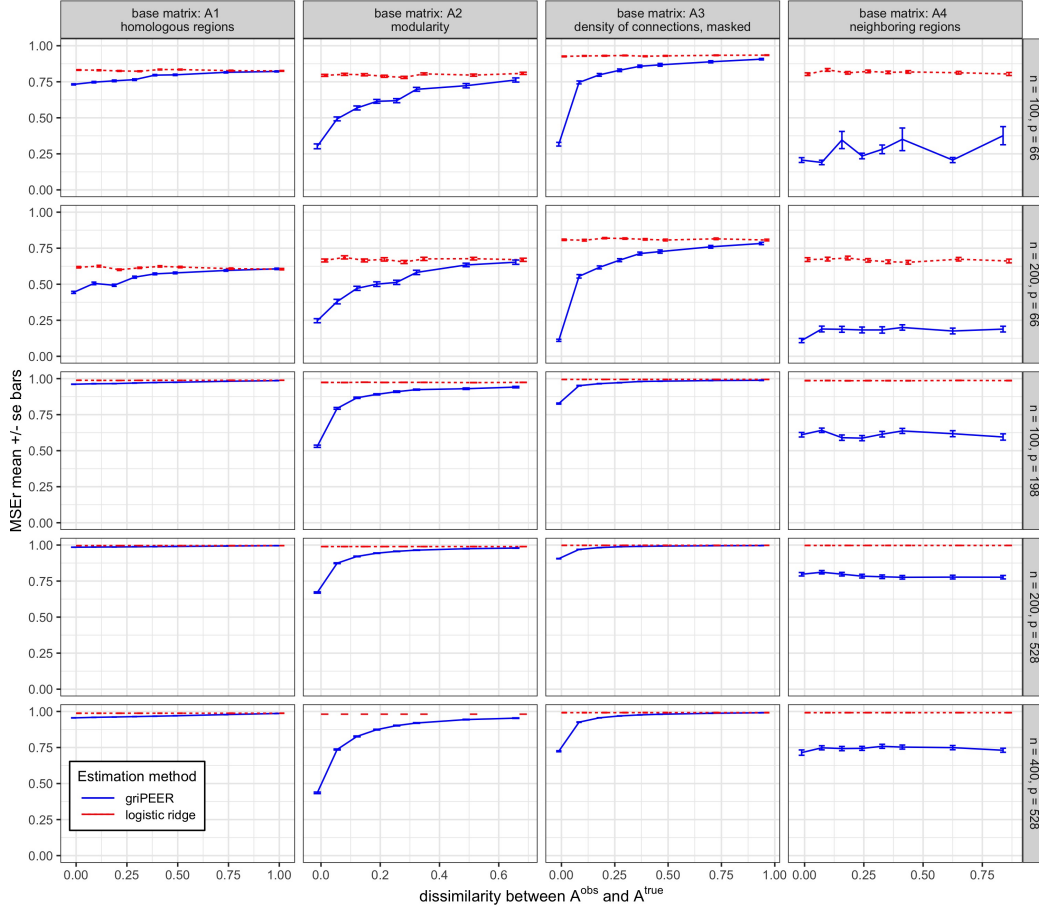

Figure 16: MSEr for estimation of  $b$  as a function of dissimilarity between  $\mathcal{A}^{obs}$  and  $\mathcal{A}^{true}$  as measured by  $diss(\mathcal{A}^{obs}, \mathcal{A}^{true})$  (Scenario 1). Results for griPEER (blue line) and logistic ridge (red line). Presented are the average values of MSEr from 100 runs for combinations of:  $n \in \{100, 200, 400\}$ ,  $p \in \{66, 198, 528\}$ . Standard errors of the mean are shown.



Table 3: Regularization parameters and execution time of numerical experiments. Presented are median values out of 100 repetitions in each of the experiment’s setting for all scenario index-specific parameter values ( $Param$ ; scenario 1: dissimilarity, scenario 2: number of connectivity matrix columns with signs switched, scenario 3: density ratio). Experiment settings are summarized by experiment scenario index ( $SC$ ; ranging 1-3), base connectivity matrix ( $\mathcal{A}$ ), number of observations ( $n$ ), and number of predictors ( $p$ ).

|    | SC | $\mathcal{A}$ | n   | p   | griP $\lambda_Q$ | griP $\lambda_R$ | rid $\lambda$ | Exec [s] |
|----|----|---------------|-----|-----|------------------|------------------|---------------|----------|
| 1  | 1  | A1            | 100 | 66  | 52.9             | 0.2              | 0.3           | 22.8     |
| 2  | 1  | A1            | 100 | 198 | 271.7            | 0.9              | 2.0           | 60.4     |
| 3  | 1  | A1            | 200 | 66  | 0.1              | 0.1              | 0.1           | 12.8     |
| 4  | 1  | A1            | 200 | 528 | 737.7            | 1.3              | 3.1           | 707.0    |
| 5  | 1  | A1            | 400 | 528 | 434.7            | 0.5              | 1.2           | 958.5    |
| 6  | 1  | A2            | 100 | 66  | 0.4              | 0.0              | 0.2           | 12.0     |
| 7  | 1  | A2            | 100 | 198 | 2.7              | 0.0              | 1.6           | 25.4     |
| 8  | 1  | A2            | 200 | 66  | 0.1              | 0.0              | 0.1           | 11.2     |
| 9  | 1  | A2            | 200 | 528 | 4.3              | 0.1              | 2.4           | 1277.0   |
| 10 | 1  | A2            | 400 | 528 | 1.8              | 0.0              | 1.0           | 288.0    |
| 11 | 1  | A3            | 100 | 66  | 0.6              | 0.0              | 0.4           | 8.0      |
| 12 | 1  | A3            | 100 | 198 | 2.1              | 0.1              | 1.8           | 21.6     |
| 13 | 1  | A3            | 200 | 66  | 0.4              | 0.0              | 0.2           | 6.7      |
| 14 | 1  | A3            | 200 | 528 | 3.1              | 0.1              | 2.5           | 258.5    |
| 15 | 1  | A3            | 400 | 528 | 1.4              | 0.0              | 1.1           | 120.0    |
| 16 | 1  | A4            | 100 | 66  | 2.2              | 0.0              | 0.2           | 24.5     |
| 17 | 1  | A4            | 100 | 198 | 2.5              | 0.0              | 1.3           | 34.1     |
| 18 | 1  | A4            | 200 | 66  | 0.9              | 0.0              | 0.1           | 10.3     |
| 19 | 1  | A4            | 200 | 528 | 3.9              | 0.0              | 2.0           | 541.0    |
| 20 | 1  | A4            | 400 | 528 | 1.4              | 0.0              | 0.9           | 354.5    |
| 21 | 2  | A1            | 100 | 66  | 0.7              | 0.2              | 0.3           | 20.5     |
| 22 | 2  | A2            | 100 | 66  | 0.4              | 0.0              | 0.2           | 9.7      |
| 23 | 2  | A3            | 100 | 66  | 0.4              | 0.0              | 0.3           | 6.0      |
| 24 | 2  | A4            | 100 | 66  | 1.1              | 0.0              | 0.2           | 3.8      |
| 25 | 3  | A1            | 100 | 66  | 0.8              | 0.1              | 0.3           | 13.0     |
| 26 | 3  | A2            | 100 | 66  | 0.8              | 0.0              | 0.3           | 12.0     |
| 27 | 3  | A3            | 100 | 66  | 1.4              | 0.0              | 0.4           | 10.2     |
| 28 | 3  | A4            | 100 | 66  | 0.5              | 0.0              | 0.2           | 13.8     |
